# Landscape of transcription and expression regulated by DNA methylation related to age of donor and cell passage in adipose-derived mesenchymal stem cells

Guan-Ming Lu<sup>1,\*</sup>, Yong-Xian Rong<sup>2,\*</sup>, Zhi-Jie Liang<sup>3</sup>, Dong-lin Hunag<sup>3</sup>, Yan-Fei Ma<sup>1</sup>, Zhi-Zhai Luo<sup>1</sup>, Fang-Xiao Wu<sup>3</sup>, Xin-Heng Liu<sup>2</sup>, Yu Liu<sup>4</sup>, Steven Mo<sup>5</sup>, Zhong-Quan Qi<sup>4</sup>, Hong-Mian Li<sup>3</sup>

<sup>1</sup>Department of Breast and Thyroid Surgery, Affiliated Hospital of Youjiang Medical University for Nationalities, Baise 533000, Guangxi, China

<sup>2</sup>Department of Burn and Plastic Surgery, Guiping People's Hospital, Guigping 537200, Guangxi, China

<sup>3</sup>Department of Plastic and Aesthetic Surgery, The Fifth Affiliated Hospital of Guangxi Medical University and The First People's Hospital of Nanning, Nanning 530022, Guangxi, China

<sup>4</sup>Medical College of Guangxi University, Nanning 530004, Guangxi, China

<sup>5</sup>Nanning Qiuzhijian Biotechnology Co., Ltd., Nanning 530229, Guangxi, China

\*Co-first authors

**Correspondence to:** Hong-Mian Li, Zhong-Quan Qi; **email:** [lihongmian@gxmu.edu.cn](mailto:lihongmian@gxmu.edu.cn), [yxyyz@gxu.edu.cn](mailto:yxyyz@gxu.edu.cn)

**Keywords:** adipose-derived mesenchymal stem cells, tissue regeneration, WGCNA, regenerative medicine, TCGAbiolinks

**Received:** May 16, 2020

**Accepted:** July 9, 2020

**Published:** October 31, 2020

**Copyright:** © 2020 Lu et al. This is an open access article distributed under the terms of the [Creative Commons Attribution License](https://creativecommons.org/licenses/by/3.0/) (CC BY 3.0), which permits unrestricted use, distribution, and reproduction in any medium, provided the original author and source are credited.

## ABSTRACT

Adipose-derived mesenchymal stem cells (ADSCs) are pluripotent stromal cells that can differentiate into a variety of cell types, including skin cells. High-throughput sequencing was performed on cells of different ages and cell passage, obtaining their methylation, mRNA expression, and protein profile data. The stemness of each sample was then calculated using the TCGAbiolinks package in R. Co-expression modules were identified using WGCNA, and a crosstalk analysis was performed on the corresponding modules. The ClusterProfile package was used for the functional annotation of module genes. Finally, the regulatory network diagram was visualized using the Cytoscape software. First, a total of 16 modules were identified, where 3 modules were screened that were most relevant to the phenotype. 29 genes were screened in combination of the RNA seq, DNA methylation seq and protein iTRAQ. Finally, a comprehensive landscape comprised of RNA expression, DNA methylation and protein profiles of age relevant ADSCs was constructed. Overall, the different omics of ADSCs were comprehensively analyzed in order to reveal mechanisms pertaining to their growth and development. The effects of age, cell passage, and stemness on the therapeutic effect of ADSCs were explored. Additionally, a theoretical basis for selecting appropriate ADSC donors for regenerative medicine was provided.

## INTRODUCTION

Strides in medicine have significantly improved the level of wound repair, but the functional and cosmetic burden that occur following wound healing remains problematic [1]. In recent years, research has suggested the feasibility of using stem cells in clinical post-traumatic repair and have potentially surprising therapeutic efficacy [2, 3].

Although highly beneficial in theory, due to certain regulatory and ethical considerations, embryonic stem cells (ESC) and induced pluripotent stem cells (iPSC) are restricted in clinical applications [4, 5]. Compared to ESC, adipose-derived mesenchymal stem cells (ADSCs) are more ideal stem cell populations in the field of regenerative medicine. ADSCs may be more easily obtained without ethical concerns [6, 7]. ADSCs were

first isolated and extracted from adipose tissue by Zuk and colleagues [2]. ADSCs are ideal in many ways: they can be harvested, processed, and propagated non-invasively, easily and efficiently. Their pluripotency and proliferation efficiency are not lower than those of bone marrow-derived MSCs, and the incidence of donors was lower than MSC collected from other sites [2]. With the development of medical technology, ADSCs have been used in the treatment of diabetic foot [8], joint degenerative disease repair [9], bone repair [10], breast reconstruction [11], and ischemic disease [12]. Animal and clinical studies have shown that ADSCs can repair damaged bone tissue or large bone segmental defects. [13, 14].

Researchers have also discovered that the epigenetic environment affects the regeneration ability of human ASCs [15]. In clinical practice, we found that the therapeutic effect of ADSCs is closely related to the age of the donor, number of passages of the cells, and stemness of the cells. However, it is unclear how such factors affect the growth and development of ADSCs. In order to better understand the mechanism of ADSCs' growth and development, a high-throughput sequencing analysis of ADSCs of different ages and varying cell passages was performed in this study. Moreover, 3 modules were identified with the most significant phenotypic correlation from 16 WGCNA modules. In addition, long non-coding RNA (lncRNA) and transcription factors (TFs) were identified that could regulate the genes of the WGCNA module. Finally, a functional enrichment analysis was conducted for the module genes, and a global regulatory network was constructed in order to comprehensively explain the molecular mechanism of ADSC development.

## RESULTS

The steps of the present study are detailed in Figure 1.

### Characteristics of ADSCs in different patient ages and cell passages

ADSCs were extracted from fat extracts, separated and amplified. Homogeneous ADSCs were observed until they reached 80–90% confluency at 7–14 days. The cells grew in a monolayer with spindle-shaped morphologies and exhibited strong proliferation. Both the 6th and 10th passages of ADSCs developed into normal morphology (Figure 2A), indicating that treatment with ADSCs may not cause malignant transformation. In addition, the proliferative capacity of ADSCs was found to be stronger in the young group than in the elderly group, indicating that the age of the donor is an important factor affecting ADSCs' proliferation.

ADSCs of the third passage in adipogenic, osteogenic, and chondrogenic media were cultured for 2 or 3 weeks. Cell morphologies were observed during the specific induction of each lineage. Multipotency of ADSCs was verified by positive staining for oil red O (Figure 2B), alizarin red (Figure 2C), and alcian blue (Figure 2D), demonstrating adipogenic, osteogenic, and chondrogenic differentiation, respectively. Consequently, the results demonstrated that ADSCs have the potential to differentiate into adipocytes, osteoblasts, and chondrocytes. Regardless of adipogenic, chondrogenic or osteoblastic differentiation, compared to the old group, the young group received more cell numbers, indicating that the younger group had better cell differentiation ability.

### Identifying phenotype-related gene co-expression modules

In order to ascertain the key module most associated with the age and passages of ADSCs, WGCNA was performed using the expression profile of the mRNA. The power was 13, which was the lowest value for the scale with an independence degree of up to 0.80. The co-expression network contained 16 modules (Figure 3A). Next, a tree diagram was constructed for the 16 modules based on the co-expression clustering distance, showing the correlation between each module (Figure 3B). In addition, a Crosstalk analysis was performed on the module, where a total of 54 Crosstalk, including 4260 interaction pairs, were obtained (Figure 3C).

Subsequently, the stemness of each sample was calculated according to the mRNA expression profiles, after which a module expression heat map was constructed (Figure 3D). The samples were then divided into three phenotypes: age, cell passages and stemness. As the number of cell passages increased, the stemness also appeared to decrease accordingly. Compared to the old group cells, the young group displayed higher stemness. The correlation and significance between the modules and phenotypes were also calculated. The orange module was found to be the module most associated with the age phenotype ( $cor=0.96$ ); the lightsteelblue1 module was the module most associated with the cell passages phenotype ( $cor=0.86$ ); and the yellowgreen module was the module most associated with the stemness phenotype ( $cor=0.99$ ) (Figure 3E). A scatter plot showing the linear correlation between phenotype and module was then established (Figures 3F–3H).

### Module-related biological processes and pathways

Figure 4A shows GO\_BP terms, which was found to significantly enrich more than the four modules. The genes of the lightsteelblue1 and yellowgreen modules were significantly enriched in “urogenital system

development” and “muscle cell differentiation”. The genes of the orange and lightsteelblue1 modules were significantly enriched in “regulation of neuron projection development” and “second-messenger-mediated signaling”. In addition, a CluGO network was built, where a total of 10 functions overlapped with the above 30 functions (Figure 4B).

By performing a KEGG analysis on the 16 modules of genes, 39 pathways with the highest number of participations were obtained (number of times $\geq$ 2) (Figure 4C). The results showed that genes of the lightsteelblue1 module were significantly enriched in the “Cytokine-cytokine receptor interaction pathway”, genes of the yellowgreen module were significantly enriched in the “Cell cycle pathway”, and genes in the orange module were significantly enriched in the “Neuroactive ligand-receptor interaction pathway”. Similarly, the ClueGO network of the KEGG pathways (Figure 4D) were constructed. Here, a total of 4 pathways overlapped with the 39 KEGG pathways mentioned above, namely, “Cytokine-cytokine receptor interaction”, “Neuroactive ligand-receptor interaction”, “Taste transduction” and “TGF-beta signaling pathway”.

### Methylation regulates gene expression in ADSCs

To obtain insight into the development of ADSCs, the methylation profile was combined with the mRNA

expression profile as well as the lncRNA expression profile, respectively. The methylation profile was compared to the mRNA expression profile to intersect, where a total of 5427 genes were obtained. Figure 5A shows the correlation and significance of methylation and mRNA expression. Among the 5427 genes where methylation and mRNA intersected, 45 significantly related genes were identified ( $|\text{cor}|>0.9, P<0.01$ ) (Figure 5B) called methylation transcription-related genes. The methylation profile was compared to the lncRNA expression profile, and a total of 4308 intersection genes were obtained (Figure 5C). Among the 4308 genes where methylation intersected with lncRNA, 33 significantly related genes were identified ( $|\text{cor}|>0.9, P<0.01$ ) (Figure 5D), of which 19 were methylation-regulated transcription genes. Then, 29 genes that had a negative correlation between methylation and mRNA expression were selected, which were considered to be transcription genes regulated by methylation. As shown in Figure 5E, most of these 29 methylation-regulated transcripts demonstrated formidable significance and correlation among the 6 samples. Of these genes, UBPI exhibited the most significant correlation.

After combining the mRNA expression profile with the protein expression profile and comparing their intersections, 2874 intersection genes were yielded, of which 117 were significantly related genes (Figure 5F). As shown in Figure 5G, these genes were highly

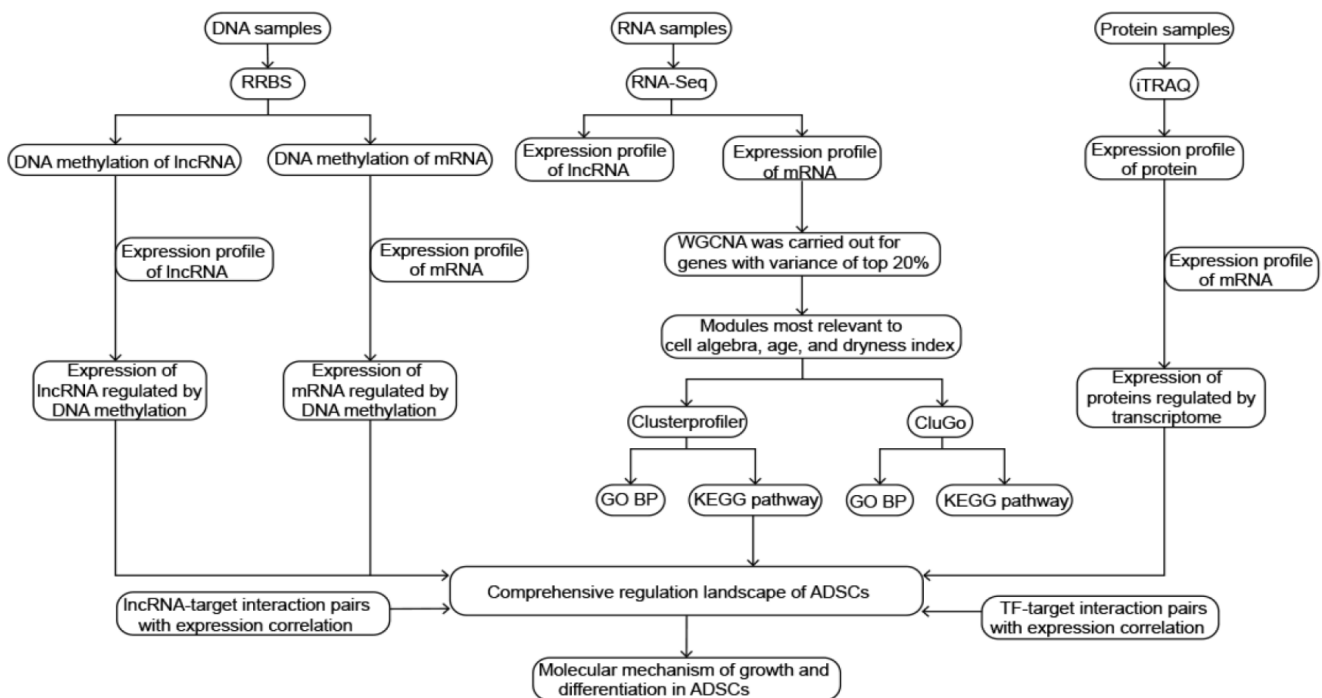

Figure 1. Flowchart in this study.



expressed in all 6 samples and possessed significant correlations. By comparing the 117 transcriptionally regulated proteins with 29 methylation-regulated transcription genes, a methylation-regulated expression gene DNAJA1 was obtained (Figure 5H). DNAJA1 has been shown to be related to immune responses [16], and its role in the development of ADSCs deserves further investigation.

### Comprehensive regulation landscape of ADSCs

To illustrate the relationship between the identified genes and the three phenotypic modules, a correlation analysis was performed between the 33 methylation-regulated lncRNA and the 1394 module genes. After combining the lncRNA expression profile and the mRNA expression profile, genes having a significant

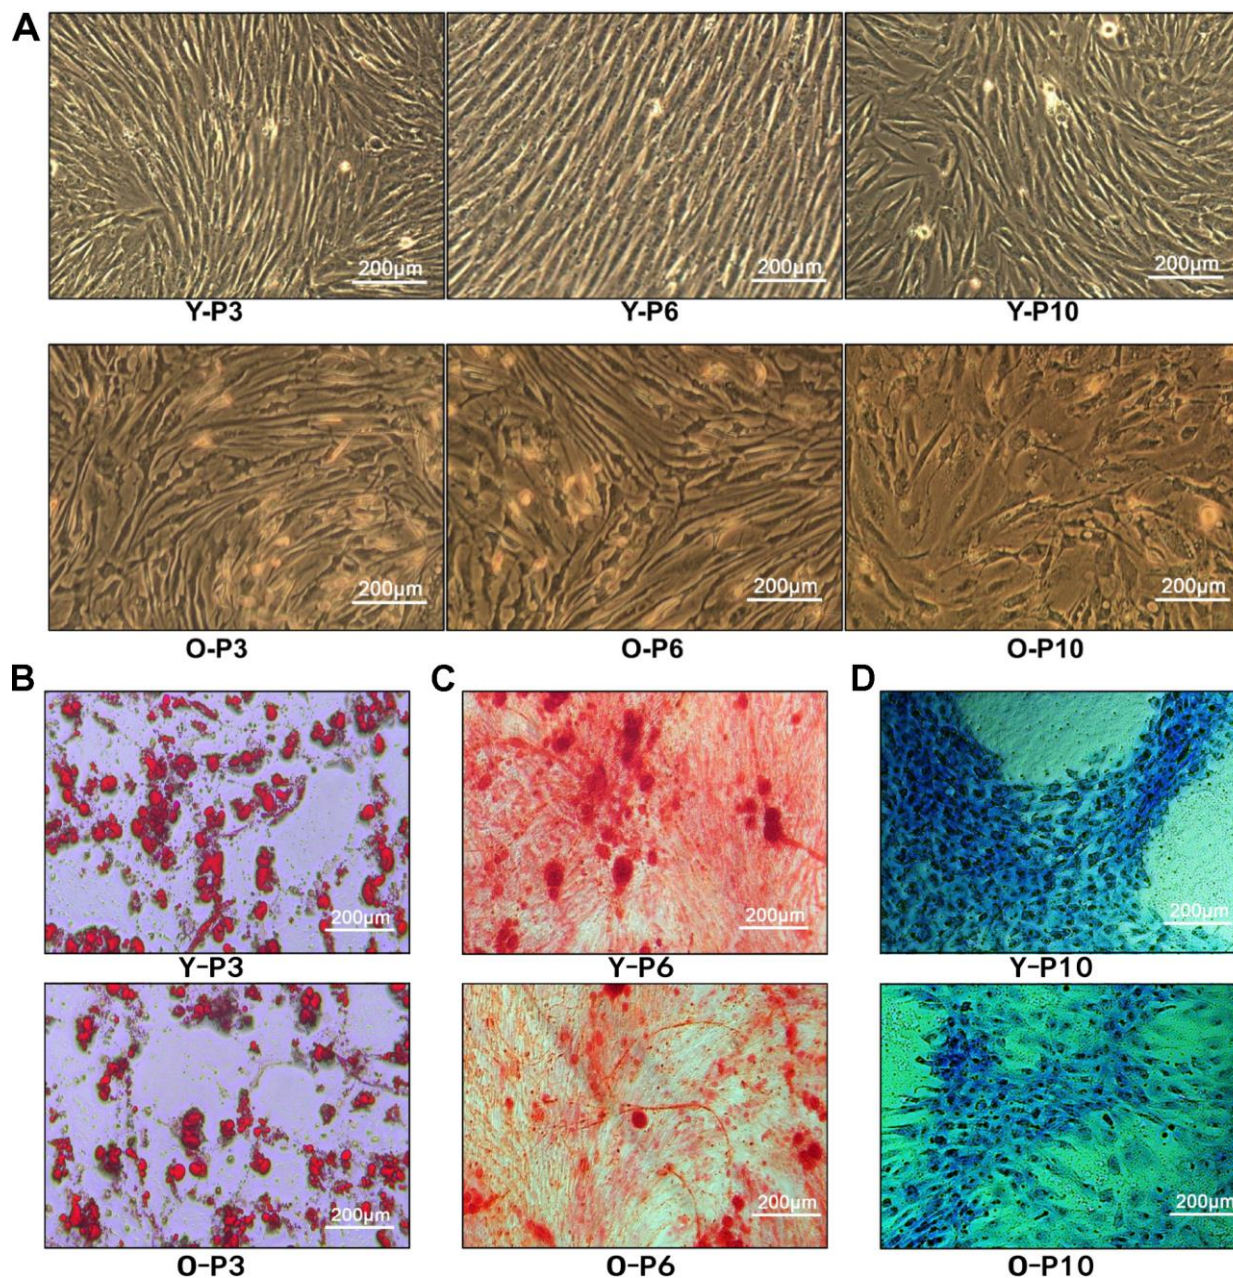

**Figure 2. Characterization of ADSCs.** (A) 3rd, 6th, and 10th passage Spindle-shaped ADSCs in young and old donors. Y-P3, Y-P6, Y-P10 represent the 3rd, 6th, and 10th passages of the young donor, respectively. O-P3, O-P6, O-P10 represent the 3rd, 6th, and 10th passages of the old donor, respectively. (B) Micrographs of 3rd generation ADSCs of young patients (up) and old patients (down) stained with Oil Red O. (C) Micrographs of 3rd generation ADSCs of young patients (up) and old patients (down) stained with Alizarin Red. (D) Micrographs of 3rd generation ADSCs of young patients (up) and old patients (down) stained with Alcian Blue.

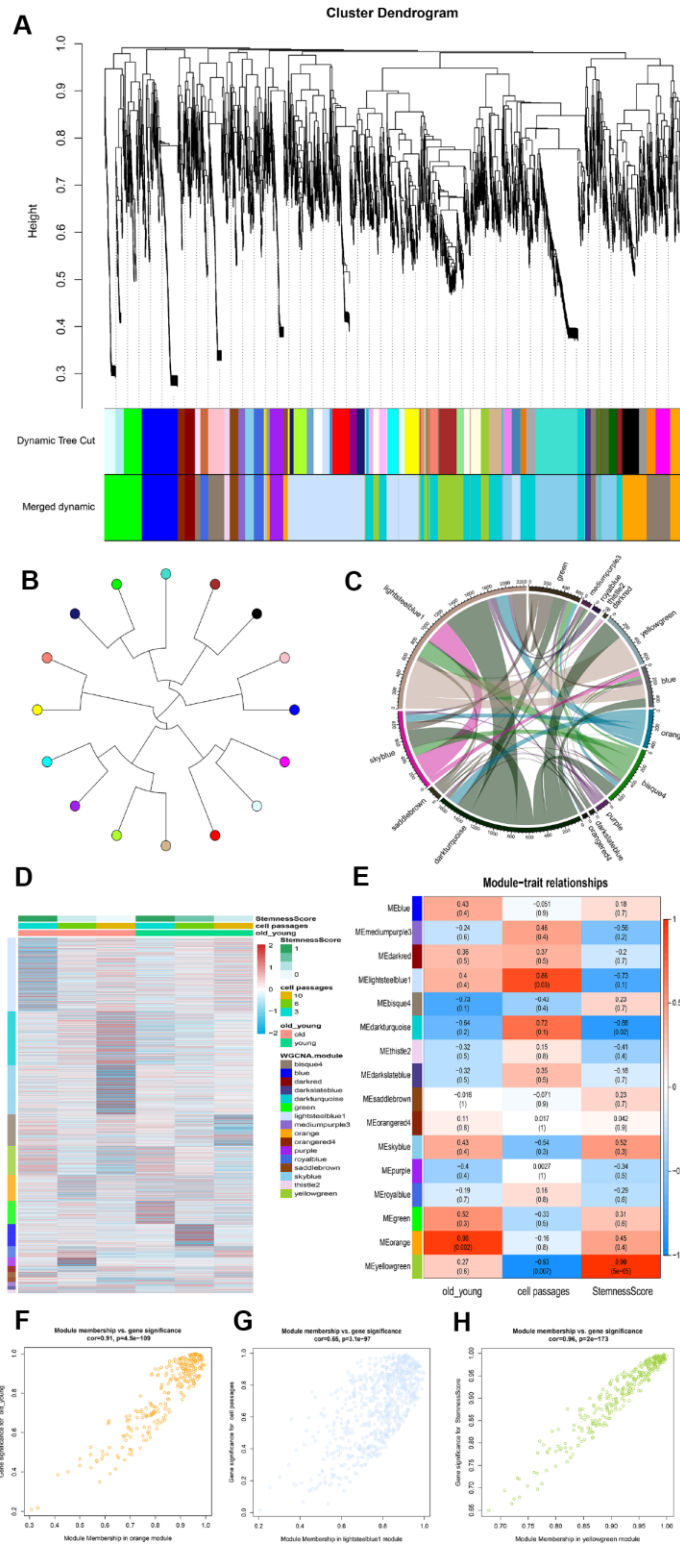

**Figure 3. Identification of modules that was significantly correlated with phenotype.** (A) Clustering dendrogram and modules. Each gene is represented by a leaf in the tree, where the y-axis represents the network distance determined by the topological overlap (TO) and different colors indicate the combined module membership. A total of 16 modules were identified. (B) Module tree diagram. Each point represents a module, and the lines indicate the interaction between the modules. (C) Cirplot between modules. (D) Cluster analysis heatmap showing the expression of different modules in different phenotypes. (E) A heatmap of the correlation between module eigengenes and ADSCs phenotype. (F–H) The scatter plot shows the correlation between different phenotypes and MEorange, MElightsteelblue1 and MEyellowgreen.



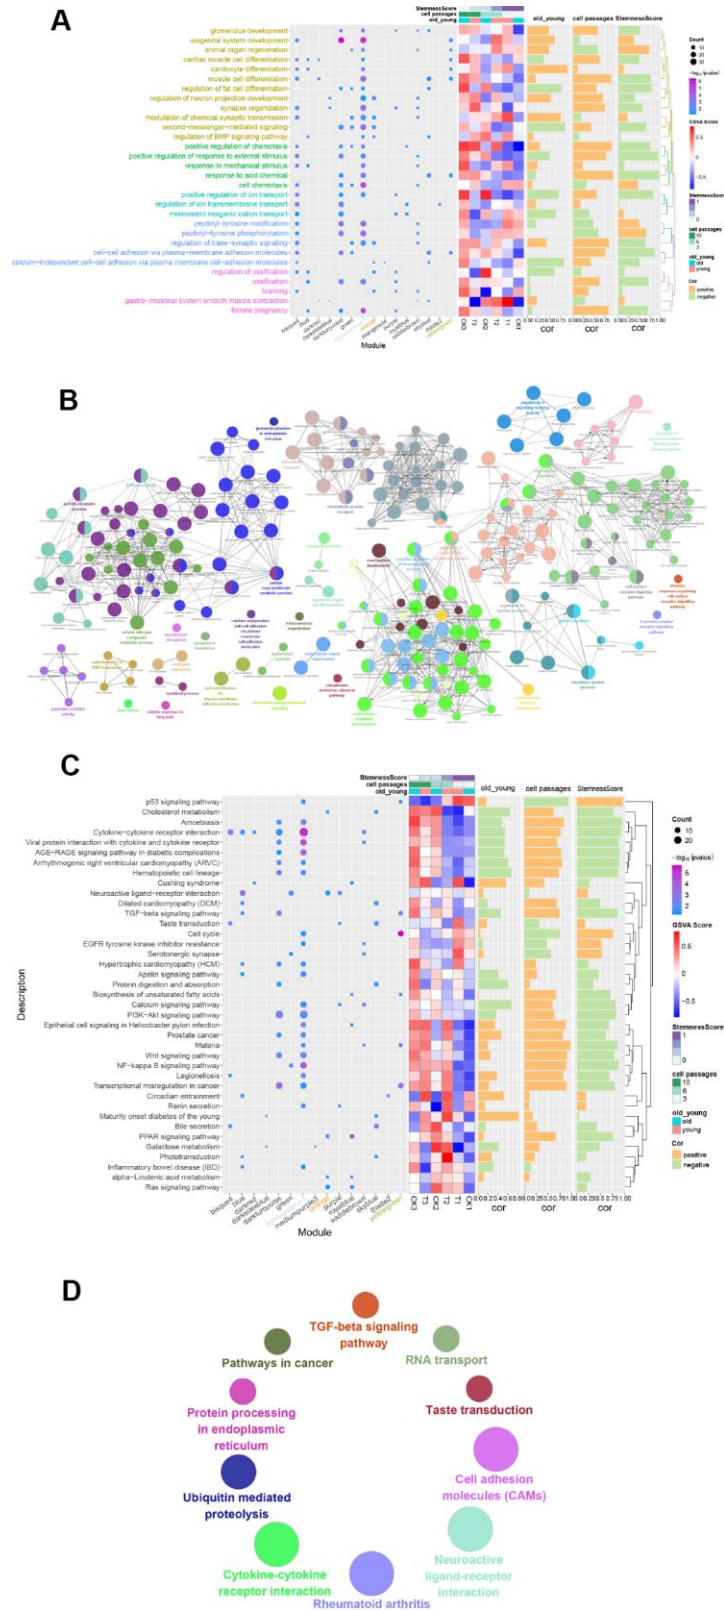

**Figure 4. Functional enrichment analysis of gene modules.** (A) GO Enrichment Analysis. Enrichment increased significantly from blue to purple. The larger the circle, the more significant the percentage of module genes that GO functions into the gene. (B) Gene functional enrichment was conducted using Cytoscape. Each dot represents a BP, and a total of 244 are enriched. (C) Enrichment Analysis of the Module Gene KEGG Pathway. From blue to purple, the concentration increased significantly. The larger the circle, the more significant the proportion of modular genes present in the KEGG pathway entry genes. (D) Enriched to 10 KEGG pathways using the ClueGO plugin for Cytoscape.

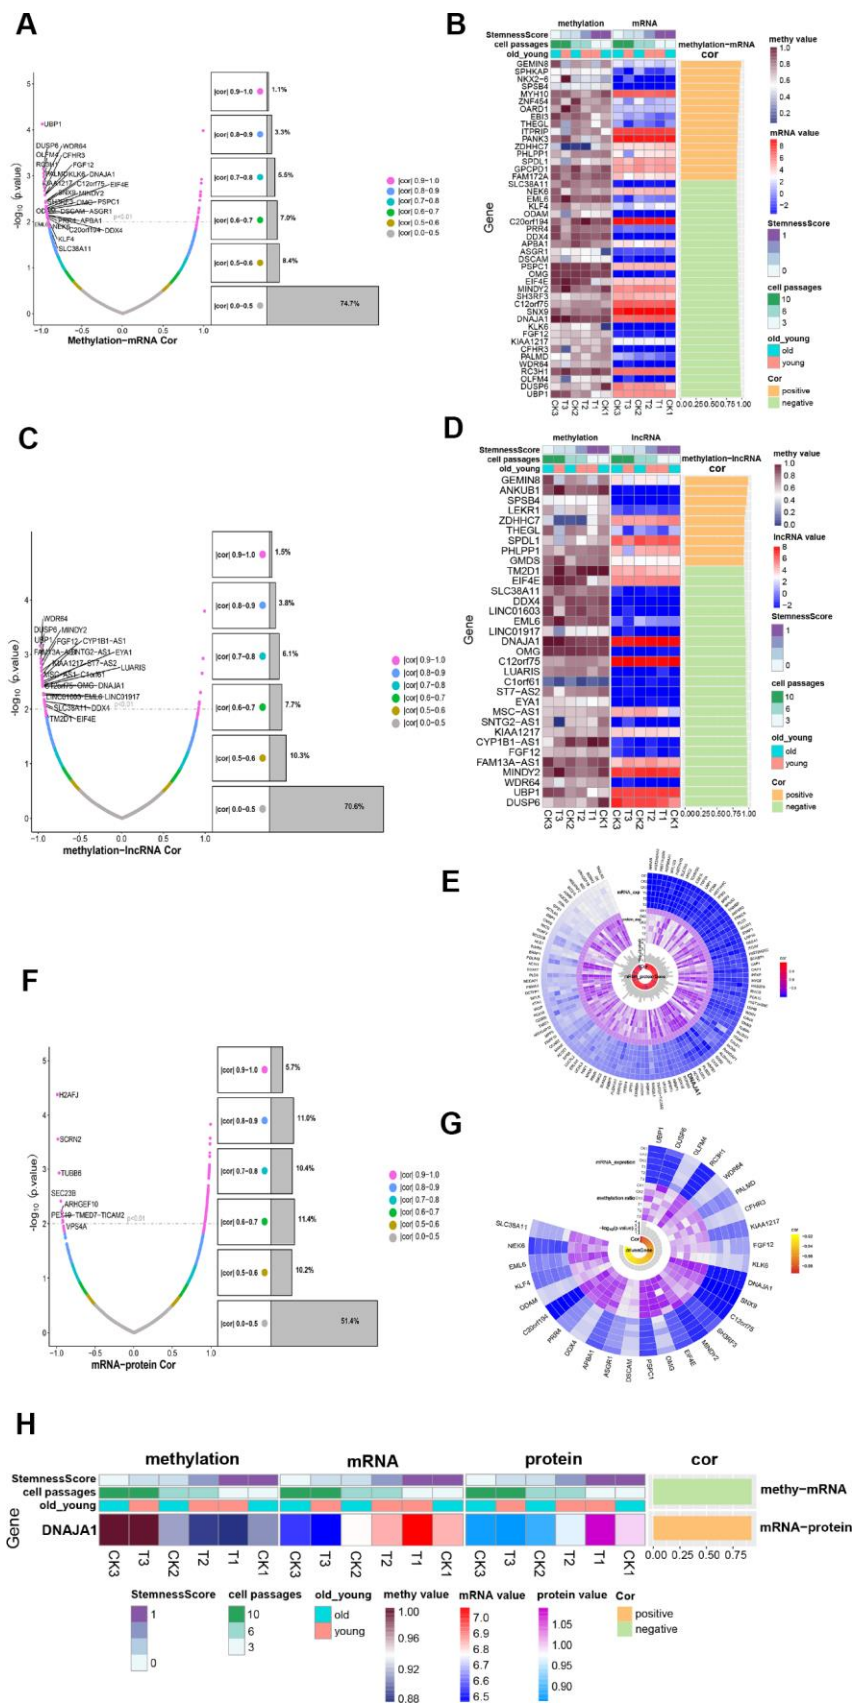

**Figure 5. Methylation regulates ADSCs' expression.** (A) Volcanic maps show the correlation and significance of methylation and mRNA expression. (B) Heatmap shows the expression of methylation-transcription related genes among different phenotypes. (C) Volcanic maps

show correlation and significance of methylation and lncRNA expression. (D) Heatmap shows the expression of methylation-lncRNA related genes in different phenotypes. (E) CircPlot shows the methylation rate and mRNA expression of 29 methylation-regulated transcription genes in 6 samples as well as their correlation and significance. (F) Volcanic maps show the correlation and significance of mRNA and protein expression. (G) circPlot displays the mRNA and protein expression of 117 mRNA\_protein related genes in 6 samples, and their correlation and significance, highlighting a methylation-regulated expression gene. (H) Heat Map-Correlation Histogram showing DNAJA1 expression.

correlation ( $|\text{cor}| > 0.9$ ,  $p < 0.01$ ) were selected and compared to the module genes, and 19 lncRNA involved in the regulation of the three most significant modules were obtained. Interestingly, one of the genes, DUSP6, was observed to be both a lncRNA and module gene. According to Fan et al, DUSP6 can inhibit epithelial-mesenchymal transition [17]. The 19 lncRNA were then compared to the previously enriched genes involved in the KEGG pathway, which showed that 15 lncRNA participated in regulating 27 KEGG pathways through 92 module genes. Ten pathways related to ADSCs were selected to construct a regulatory network map. As shown in Figure 6A, 15 lncRNA participated in the regulation of 10 KEGG pathways through 68 module genes.

Based on the interaction of human transcription factors (TFs) and their target genes in the TRRUST v2 [18] database, a correlation analysis was conducted on the interaction pairs of TFs and target genes. Here, 440 significantly related gene pairs ( $|\text{cor}| > 0.9$ ,  $p < 0.01$ ) intersected with the module genes, and 40 TFs involved in the regulation of the three most significant modules were obtained. The intersection of these 40 TFs and genes involved in the KEGG pathway showed that 24 TFs participated in regulating 21 KEGG pathways through 29 module genes. Similarly, 10 pathways related to ADSCs were selected so as to construct a regulatory network map. The results demonstrated that 22 TFs participated in the regulation of 10 KEGG pathways through 24 module genes (Figure 6B).

According to the GSVA scores of the 39 KEGG pathways in the methylation, mRNA expression, lncRNA and protein expression profiles, the correlation between methylation and RNA or RNA and protein were analyzed. Finally, a comprehensive regulatory network was built using the Cytoscape [19] software. In this network, 15 lncRNA and 22 TFs participated in the regulation of 11 KEGG pathways through 80 module genes (Figure 6C). Overall, the 11 screened KEGG pathways were found to play an important role in the growth and development of ADSCs. Mechanically, in the Wnt signaling pathway, the expression of CCND2 was regulated by TCF / LEF, which affects the cell cycle (Figure 7A). RELA affects the survival and inflammation of cells through the NF-kappa B signaling pathway. In addition, it can

also lead to the activation of noncanonical pathway of cells (Figure 7B). In the Cell cycle pathway, RBL1 can affect the expression of C-Myc, indirectly affecting S-phase proteins (Figure 7C).

## DISCUSSION

Due to the continuous advancement of medical technology, the scope of ADSCs' application has widened. The potential of ADSCs for use in regenerative medicine has been extensively explored. ADSCs are multipotent stromal cells that differentiate into a variety of cell types [20]. Studies have shown that ADSCs may successfully differentiate into a neural lineage and Schwann cells [21, 22]. Many studies have confirmed that ADSCs play an indispensable role in regenerative medicine [23, 24]. Furthermore, research has demonstrated that the use of ADSCs is safe and feasible in the clinical treatment of wounds [25, 26].

To ensure the effectiveness and safety of ADSC transplantation, the choice of donor is particularly important. Age, cell passage and stemness largely determine the quality of ADSC donors. However, phenotype-related genes that affect the therapeutic effect of ADSCs, as well as the molecular mechanisms that occur in the course of regenerative medicine, remain unclear. Therefore, from the perspective of multiomics, the molecular mechanism of ADSCs at different ages and different cell passage was comprehensively analyzed in the present study. It is commonly thought that the younger the donor is, the less the passage of cells and the higher the stemness of cells. Nevertheless, this study found that even in an old group of ADSCs, when the number of cell passages is small, the stemness is also high, indicating that cell passage has a greater effect on the stemness of ADSCs than donor age.

In order to explore this mechanism, the modules most relevant to the three phenotypes were identified: MEorange, MELightsteelblue1, and MEyellowgreen. In addition, function and pathway enrichment analyses were also performed on the modules. The enrichment analysis showed that functional modules involve multiple GO terms and pathways, which may likely reflect the complexity of ADSCs. Moreover, MELightsteelblue1 (the module most relevant to the cell



passage) was found to be significantly enriched in ligand for APJ, which is widely distributed in the limbs, heart, brain, adipose tissue, and kidney. Studies have found that Apelin regulates the osteogenic differentiation of mesenchymal stem cells through the "Wnt /  $\beta$ -catenin signaling pathway" and promotes bone healing [27]. By conducting an in-depth analysis of methylation, transcription expression and protein

"Apelin signaling pathway". Apelin is the endogenous profiles, 29 methylation-regulated transcription genes, 33 methylation-regulated lncRNAs, and 117 transcription-regulated proteins were identified. Particularly, among the methylation-regulated transcription-related genes, UBP1 was found to be the most relevant gene. Upstream-binding protein 1 (UBP1) is a transcriptional activator that operates in a promoter

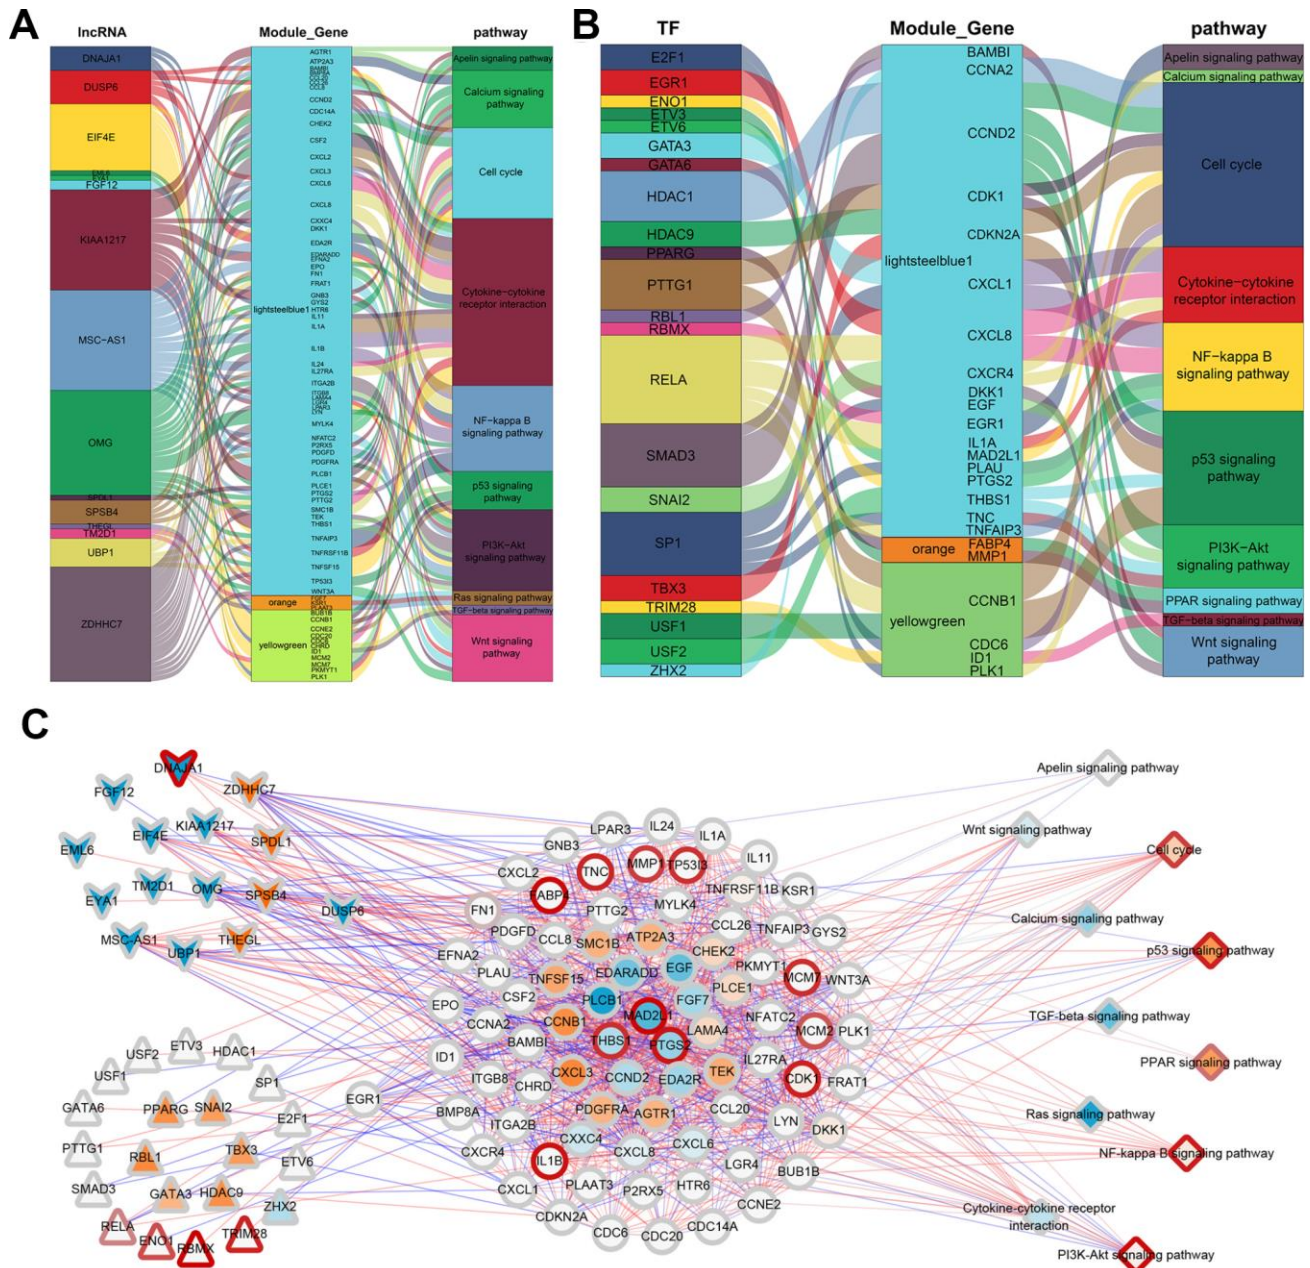

**Figure 6. ADSCs' integrated regulatory network. (A)** Sankey plot of gene module regulation by lncRNAs. Each square on the left represents a lncRNA, where the middle square represents a modular gene and the right square represents the pathway. **(B)** Map of gene module regulation by TFs. Each square on the left represents a TF, where the middle square represents a modular gene and the right square represents a pathway. **(C)** Integrated regulatory network of lncRNA/TF-target genes-pathways. Squares represent pathways; circles represent modular genes; arrows represent lncRNA; and triangles represent TFs.

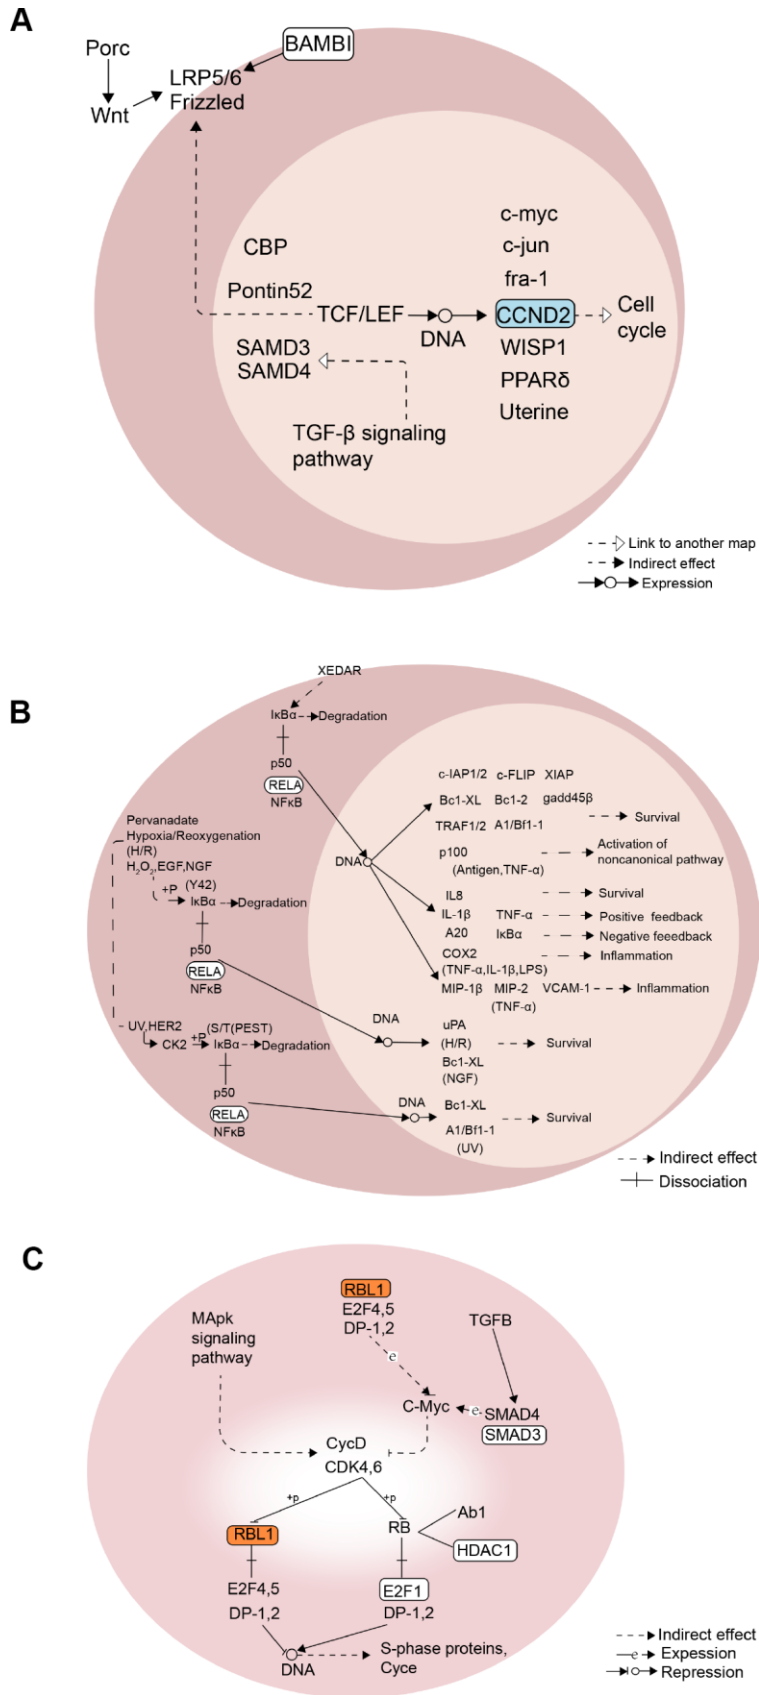

**Figure 7. Mechanism diagram of the KEGG pathway. (A) Wnt signaling pathway. (B) NF-kappa B signaling pathway. (C) Cell cycle pathway.**

context-dependent manner. Previous studies have shown that UBP1 is closely related to biological processes like "angiogenesis" and "Transcription regulation" [28], indicating that UBP1 may play an important regulatory role in the value-added differentiation of ADSCs. In addition, the gene DNAJA1 was identified, which intersected with methylation, transcription, and protein and was defined as a methylation-regulated expression gene. Studies have found that the fate of misfolded mutp53 is regulated by DNAJA1. Inhibition of DNAJA1 induces CHIP-mediated mutp53 degradation, while its overexpression antagonizes statin-induced mutp53 degradation [29]. Jaime et al have demonstrated that the overexpression of DNAJA1 reduces the viability of pancreatic cancer cells [30]. Whether the presence of DNAJA1 may also reduce cell mutations after ADSC transplantation warrants further investigation.

ADSCs are considered to have stronger immunosuppressive effects than mesenchymal stem cells (MSCs) from different tissue sources [31] and possess clinical potential for the treatment of immune diseases [32]. The immunosuppressive capacity of ASCs is both dose-dependent and cell-passaging [33]. In this study, the transcription factor RELA was found to regulate the NF- $\kappa$ B signaling pathway by regulating the genes of lightsteelblue1 modules, such as CXCL8 and TNFAIP3. The NF- $\kappa$ B signaling pathway is closely related to immune and inflammatory responses, and the abnormal activation of this pathway is involved in the pathogenesis of various autoimmune and inflammatory diseases [34], indicating that the number of passages of ADSCs is also related to immunomodulatory pathways.

Finally, a comprehensive regulatory network was innovatively built in the present study. Accordingly, 15 lncRNA and 22 TFs were involved in regulating 11 KEGG pathways through 80 module genes. These genes are considered to be important genes in the growth and development of ADSCs, and these pathways serve as molecular mechanisms of their role. In summary, in this regulatory network, the identified genes regulate different pathways through varying molecular mechanisms, thereby affecting the growth and development of ADSCs.

Certain limitations are present in this study. First, only two donors were enrolled in the study. Although thousands of genes were obtained by sequencing, the relatively small number of patients may have reduced the reliability of the conclusions. Second, this study is limited to computer simulations, hence, the findings should be validated and extended in laboratory experiments. Although this investigation showed that

lncRNA and TFs play important roles in the growth and development of ADSCs, further experiments should confirm the molecular processes in which they are involved.

## MATERIALS AND METHODS

### Donors and samples

This study was approved by the ethics committee of the First People's Hospital of Nanning, Guangxi Zhuang Autonomous Region. Written informed consent was obtained from all donors. Human lipoaspirate from abdominal subcutaneous fat from healthy adult donors (Table 1) was stored for less than 48 hr at 4°C before processing. The ADSCs of human lipoaspirate was obtained by type I collagenase digestion. Briefly, lipoaspirate was diluted with an equal volume of phosphate-buffered saline (PBS) and digested with Dulbecco's modified Eagle's medium (DMEM) containing 10% bovine serum albumin and 1 mg/ml type I collagenase for 1 hr under agitation at 37°C. The isolated cells were seeded into cell culture dishes and incubated at 37 °C in 5% CO<sub>2</sub>. The cells were then observed under a microscope to evaluate their expansion rate and cell morphology, harvested at a fusion degree of 80% to 90%, and passaged at a ratio of 1:3. Cells were taken from passages 3, 6, and 10 for later genome methylation sequencing, RNA sequencing (RNA-seq), and mass spectrum (MS) analysis. Finally, the 3rd, 6th, and 10th passages cells of the young and old donors were collected, respectively, for a total of 6 samples.

### Cell-induced differentiation and staining

#### *Adipogenic induction*

ADSCs were cultured in human adipose-derived stem cell adipogenic differentiation basal medium containing fetal bovine serum (20mL), glutamine (2mL), penicillin-streptomycin (2mL), insulin (400uL), IBMX (200uL), rosiglitazone (200uL) and dexamethasone (200uL) for two weeks. Cells were then placed in a 37 °C, 5% CO<sub>2</sub> incubator, and after adipogenic differentiation was completed, the cells were stained with Oil Red O for 30 minutes and washed with 1 × PBS 2-3 times. The effect of adipogenic staining was observed under a microscope.

#### *Osteogenesis induction*

ADSCs were cultured in human adipose-derived stem cell osteogenic differentiation basal medium containing fetal bovine serum (20mL), penicillin-streptomycin (2mL), glutamine (2mL), ascorbate (400uL),  $\beta$ -glycerophosphate (2mL) and dexamethasone (20uL) for two weeks. After osteogenic differentiation was



**Table 1. Subject characteristics.**

| Subject | Age(yr) | Sex | Height (cm) | Weight (kg) | BMI (body mass index) | health condition |
|---------|---------|-----|-------------|-------------|-----------------------|------------------|
| S1      | 24      | F   | 161         | 53          | 20.4                  | health           |
| S2      | 62      | F   | 160         | 55          | 21.5                  | health           |

completed, a staining analysis was performed using alizarin red staining solution. The culture plate was placed under a microscope to observe the effect of osteogenic staining.

### **Chondrogenic induction**

ADSCs were cultured in human adipose-derived stem cell chondrogenic differentiation basal medium containing dexamethasone (20uL), ascorbate (600uL), ITS + supplement (2mL), sodium pyruvate (200uL), proline (200uL) and TGF- $\beta$ 3 (2mL) for two weeks. After chondrogenic induction was completed, the cartilage ball was embedded in paraffin, sectioned, and stained with alixin blue. The effect of Alisin blue staining was then observed under a microscope. The partially stained Alisin blue stain demonstrated endo-acid mucopolysaccharide in cartilage tissue.

### **RNA extraction and sequencing**

Total RNA was isolated using the RNeasy Micro Kit, after which rRNA was removed and all non-coding RNA (ncRNA) were retained to the maximum. The obtained mRNA was randomly interrupted into short fragments, and the fragmented mRNA was used as a template to synthesize the first strand of cDNA with random hexamers. Buffers, dNTPs, RNase H, and DNA polymerase I were then added to synthesize the second strand of cDNA. QiaQuick PCR kit was used for purification, and EB buffer was added to elute the terminal repair. Next, base A and sequencing adapter was added, after which the second chain was degraded by Uracil-N-Glycosylase. Bru-labeled, nascent RNA was then isolated, converted into cDNA libraries and sequenced using an Illumina HiSeq<sup>TM</sup> 2500 sequencer. The raw data obtained following sequencing was first filtered to remove low quality data and adapters to obtain HQ clean data. The reads of the filtered rRNA were compared to the reference genome, which was followed by transcript reconstruction. The assembled transcript was compared to known mRNA and lncRNA reference sequences so as to obtain all novel transcripts. Following the prediction of coding potential, the coding and non-coding parts were distinguished in order to obtain the final predicted lncRNA. The raw image data obtained by sequencing was converted into sequence data via base calling. It was then termed raw data, after which the results were stored in the FASTQ file format.

### **DNA methylation profile**

LCM-DNAs from ADSCs were fragmented to 100–500 bp by 44 psi of gas for 1 min through a nebulizer and subjected to methylated DNA enrichment using a MethylMiner Methylated DNA Enrichment Kit. Then, the methylated fragments were eluted with High-Salt Elution Buffer (Invitrogen) and purified with a MinElute PCR Purification Kit (Qiagen). The DNA samples were end-repaired, ligated to Illumina methylated DNA adaptors and separated on agarose gel to isolate 150 ~ 340 bp fragments. DNA was then bisulfite converted using ZYMO EZ DNA Methylation-Gold kit and amplified by PCR. Each RRBS (Reduced representation bisulfite sequencing) library was sequenced on the Illumina platform Hisise PE150 sequencer. The bismark tool was utilized to compare the available data with the reference genome to acquire the comparison results. Finally, a methylation analysis was performed using methylKit.

### **Proteome sequencing**

Isobaric Tags for Relative and Absolute Quantitation (iTRAQ) technology is a proteomic quantification technology that can perform up to 8 samples in one experiment. This form of quantification can quantify almost any protein sample and possesses characteristics of high quantitative precision, which has been widely used in quantitative proteomics [35]. First, the protein was extracted from the sample and subjected to reduction and alkylation, after which the proteins in each group were digested overnight with trypsin (4.44  $\mu$ g/10  $\mu$ L) at 37°C. Samples were then labelled with iTRAQ reagents by following the protocol provided by the vendor. iTRAQ labelled peptides were fractionated with strong cation exchange C18 SPE, dried under a vacuum and passed through a C18 SPE cartridge to desalt the sample. It was then eluted with 500  $\mu$ l CH<sub>3</sub>CN : water : formic acid (50:50:0.1, v:v:v), followed by 200  $\mu$ l CH<sub>3</sub>CN. The flow-through was then passed through an Oasis C18 SPE cartridge to maximise sample recovery by capturing any peptides that may have passed through the C18 SPE.

The iTRAQ labeled peptides were subsequently dried, reconstituted and acidified with 10 mM monopotassium phosphate and 25% acetonitrile (pH 3.0) for further fractionation by strong cation exchange

(SCX) chromatography. The protein concentrations of all eluted samples were monitored by an absorbance at 214 nm, and fractions were collected every minute. The collected fractions were subsequently desalted on C18 Cartridges and concentrated via vacuum centrifugation. All samples were stored at  $-80^{\circ}\text{C}$  for Liquid Chromatography Coupled with Tandem Mass Spectrometry (LC/MS/MS) analysis. Peak identification was performed on the original file obtained after mass spectrometry analysis in order to obtain a peak list. A reference database was established to identify peptides and proteins, and the relative content of each protein in each sample was compared to obtain the protein profile data.

### Data preprocessing

The sequencing data were normalized using the “*voom*” function of the *limma* package [36] in R, which obtained a total of 19,189 genes and 21,965 lncRNAs. Proteome and methylation sequencing data did not need to be normalized. Hence, a total of 3025 proteins and 8070 methylated genes were obtained.

### Stemness calculation

Stemness is considered to be the potential for cell self-renewal and differentiation. Under default parameters, the R package TCGAbiolinks [37] was used to calculate the stemness of the overall mRNA expression profile of each sample to obtain the stemness of each sample.

### Weighted correlation network analysis (WGCNA)

The top 20% of genes with the largest variance were selected from mRNA expression profiles, and the expression profiles of these genes were constructed. A systems biology analysis approach based on WGCNA was done to identify clusters of mRNA expression profiles in an unsupervised manner [38]. First, hierarchical clustering analysis was conducted using the *hclust* function. Then, the soft threshold power value was filtered using the *pickSoftThreshold* function. Candidate power values (1 to 30) were used to test the average connectivity and independence of the different modules. If the degree of independence was  $> 0.8$ , the appropriate power value was selected. Then, the highly relevant modules were further merged via *mergeCloseModules* function in the WGCNA R package. The highly correlated genes were used to construct correlation networks, which facilitated gene screening methods used to identify candidate biomarkers. The WGCNA R software package was then used to build a co-expression network. The minimum module size was set to 30 and was assigned a unique color for each module.

### Crosstalk analysis

Crosstalk was a hot topic in recent years. Studying the crosstalk between diseased cells may elucidate the underlying mechanism of disease [39, 40]. According to the rules, in a random background in the STRING database [41], when the interaction pairs between modules were greater than the interaction pairs in the background, this interaction is called crosstalk. The *chordDiagram* function of the *circlize* [42] package in R was used to demonstrate the interaction between modules. First, in the context of random networks, the number of interaction pairs between modules in  $N$  random networks was greater than the number of interaction pairs between modules in a real network, which was denoted as  $n$ . The formula for calculating the  $p$  value was:  $p = n / N$  ( $N = 1000$ ). When  $p < 0.05$ , it can be considered that the corresponding crosstalk module pairs were more significant than random. Finally, the Cytoscape software was used to display significant crosstalk in order to visually observe the complex regulatory relationships between co-expression modules.

### Functional enrichment analysis and Gene set variation analysis (GSVA)

To further identify the potential functions of genes among the ADSCs-associated modules, a Gene Ontology (GO) and Kyoto Encyclopedia of Genes and Genomes (KEGG) pathway enrichment analysis were performed. The *clusterProfiler* [43] package in R was employed in the enrichment analysis for the 16 modules. A  $p$  value  $< 0.01$  was set as the cutoff criteria in the GO enrichment analysis, while a  $p$  value  $< 0.05$  was the cutoff criteria in the KEGG enrichment analysis. In addition, the *ClueGO* plugin in Cytoscape [44] was used to build the GO\_BP network as well as the KEGG pathway network. The GO and KEGG networks were used to reflect the relationships of GO terms according to the similarity of their related genes. A  $p$  value  $< 0.05$  was considered to be significant. GSVA [45] was used to score individual samples against the GO and KEGG pathways, and each sample received an GSVA score.

### AUTHOR CONTRIBUTIONS

Guan-Ming Lu, Yong-Xian Rong, Steven Mo, Dong-Lin Hunag, Fang-Xiao Wu and Hong-Mian Li: Conception and design, and Manuscript writing. Zhi-Jie Liang, Steven Mo, Zhi-Zhai Luo and Yan-Fei Ma: Provision of study material or patients, Collection and/or assembly of data. Xin-Heng Liu and Hong-Mian Li: Data analysis and interpretation. Hong-Mian Li and Guan-Ming Lu: Financial and administrative support. All authors: Final approval of manuscript.

## CONFLICTS OF INTEREST

The authors declare no conflicts of interest.

## FUNDING

This work was financially supported by the National Nature Science Foundation of China (81760346, 81860341, 81771271), National Key R&D Program of China (2018YFA0108304), Guangxi Natural Science Foundation (2018GXNSFAA281148, 2019JJA140071), Scientific Research and Technology Development Program of Nanning (20173021-2, 20183037-1, 20191034, 20193100), and Yong River Program of innovation and entrepreneurship of Nanning (2018-01-07), The First Batch of High-level Talent Scientific Research Projects of the Affiliated Hospital of Youjiang Medical University for Nationalities in 2019 (Contract No. R20196307).

## REFERENCES

1. Li P, Guo X. A review: therapeutic potential of adipose-derived stem cells in cutaneous wound healing and regeneration. *Stem Cell Res Ther.* 2018; 9:302. <https://doi.org/10.1186/s13287-018-1044-5> PMID:30409218
2. Zuk PA, Zhu M, Mizuno H, Huang J, Futrell JW, Katz AJ, Benhaim P, Lorenz HP, Hedrick MH. Multilineage cells from human adipose tissue: implications for cell-based therapies. *Tissue Eng.* 2001; 7:211–28. <https://doi.org/10.1089/107632701300062859> PMID:11304456
3. Ko SH, Nauta A, Wong V, Glotzbach J, Gurtner GC, Longaker MT. The role of stem cells in cutaneous wound healing: what do we really know? *Plast Reconstr Surg.* 2011 (Suppl 1); 127:10S–20S. <https://doi.org/10.1097/PRS.0b013e3181f8e2d8> PMID:21200267
4. Orlic D, Hill JM, Arai AE. Stem cells for myocardial regeneration. *Circ Res.* 2002; 91:1092–102. <https://doi.org/10.1161/01.res.0000046045.00846.b0> PMID:12480809
5. Ben-David U, Benvenisty N. The tumorigenicity of human embryonic and induced pluripotent stem cells. *Nat Rev Cancer.* 2011; 11:268–77. <https://doi.org/10.1038/nrc3034> PMID:21390058
6. Timper K, Seboek D, Eberhardt M, Linscheid P, Christ-Crain M, Keller U, Müller B, Zulewski H. Human adipose tissue-derived mesenchymal stem cells differentiate into insulin, somatostatin, and glucagon expressing cells. *Biochem Biophys Res Commun.* 2006; 341:1135–40. <https://doi.org/10.1016/j.bbrc.2006.01.072> PMID:16460677
7. Uysal CA, Tobita M, Hyakusoku H, Mizuno H. The effect of bone-marrow-derived stem cells and adipose-derived stem cells on wound contraction and epithelization. *Adv Wound Care (New Rochelle).* 2014; 3:405–13. <https://doi.org/10.1089/wound.2014.0539> PMID:24940554
8. Moon KC, Chung HY, Han SK, Jeong SH, Dhong ES. Possibility of injecting adipose-derived stromal vascular fraction cells to accelerate microcirculation in ischemic diabetic feet: a pilot study. *Int J Stem Cells.* 2019; 12:107–13. <https://doi.org/10.15283/ijsc18101> PMID:30836733
9. Jo CH, Chai JW, Jeong EC, Oh S, Shin JS, Shim H, Yoon KS. Intra-articular injection of mesenchymal stem cells for the treatment of osteoarthritis of the knee: a 2-year follow-up study. *Am J Sports Med.* 2017; 45:2774–83. <https://doi.org/10.1177/0363546517716641> PMID:28746812
10. Lee K, Kim H, Kim JM, Kim JR, Kim KJ, Kim YJ, Park SI, Jeong JH, Moon YM, Lim HS, Bae DW, Kwon J, Ko CY, et al. Systemic transplantation of human adipose-derived stem cells stimulates bone repair by promoting osteoblast and osteoclast function. *J Cell Mol Med.* 2011; 15:2082–94. <https://doi.org/10.1111/j.1582-4934.2010.01230.x> PMID:21159123
11. Yoshimura K, Asano Y, Aoi N, Kurita M, Oshima Y, Sato K, Inoue K, Suga H, Eto H, Kato H, Harii K. Progenitor-enriched adipose tissue transplantation as rescue for breast implant complications. *Breast J.* 2010; 16:169–75. <https://doi.org/10.1111/j.1524-4741.2009.00873.x> PMID:19912236
12. Kastrup J, Haack-Sørensen M, Juhl M, Harary Søndergaard R, Follin B, Drozd Lund L, Mønsted Johansen E, Ali Qayyum A, Bruun Mathiasen A, Jørgensen E, Helqvist S, Jørgen Elberg J, Bruunsgaard H, Ekblond A. Cryopreserved off-the-shelf allogeneic adipose-derived stromal cells for therapy in patients with ischemic heart disease and heart failure—a safety study. *Stem Cells Transl Med.* 2017; 6:1963–71. <https://doi.org/10.1002/sctm.17-0040> PMID:28880460
13. Fan J, Park H, Lee MK, Bezouglaia O, Fartash A, Kim J, Aghaloo T, Lee M. Adipose-derived stem cells and BMP-2 delivery in chitosan-based 3D constructs to enhance bone regeneration in a rat mandibular defect model. *Tissue Eng Part A.* 2014; 20:2169–79. <https://doi.org/10.1089/ten.TEA.2013.0523> PMID:24524819
14. Li X, Yao J, Wu L, Jing W, Tang W, Lin Y, Tian W, Liu L. Osteogenic induction of adipose-derived stromal cells:



- not a requirement for bone formation in vivo. *Artif Organs*. 2010; 34:46–54.  
<https://doi.org/10.1111/j.1525-1594.2009.00795.x>  
 PMID:[19821812](https://pubmed.ncbi.nlm.nih.gov/19821812/)
15. Pepin ME, Infante T, Benincasa G, Schiano C, Miceli M, Ceccarelli S, Megiorni F, Anastasiadou E, Della Valle G, Fatone G, Faenza M, Docimo L, Nicoletti GF, et al. Differential DNA methylation encodes proliferation and senescence programs in human adipose-derived mesenchymal stem cells. *Front Genet*. 2020; 11:346.  
<https://doi.org/10.3389/fgene.2020.00346>  
 PMID:[32351540](https://pubmed.ncbi.nlm.nih.gov/32351540/)
  16. Orthwein A, Zahn A, Methot SP, Godin D, Conticello SG, Terada K, Di Noia JM. Optimal functional levels of activation-induced deaminase specifically require the Hsp40 DnaJ1. *EMBO J*. 2012; 31:679–91.  
<https://doi.org/10.1038/emboj.2011.417>  
 PMID:[22085931](https://pubmed.ncbi.nlm.nih.gov/22085931/)
  17. Fan MJ, Liang SM, He PJ, Zhao XB, Li MJ, Geng F. Dusp6 inhibits epithelial-mesenchymal transition in endometrial adenocarcinoma via ERK signaling pathway. *Radiol Oncol*. 2019; 53:307–15.  
<https://doi.org/10.2478/raon-2019-0034>  
 PMID:[31553703](https://pubmed.ncbi.nlm.nih.gov/31553703/)
  18. Han H, Cho JW, Lee S, Yun A, Kim H, Bae D, Yang S, Kim CY, Lee M, Kim E, Lee S, Kang B, Jeong D, et al. TRRUST v2: an expanded reference database of human and mouse transcriptional regulatory interactions. *Nucleic Acids Res*. 2018; 46:D380–86.  
<https://doi.org/10.1093/nar/gkx1013> PMID:[29087512](https://pubmed.ncbi.nlm.nih.gov/29087512/)
  19. Shannon P, Markiel A, Ozier O, Baliga NS, Wang JT, Ramage D, Amin N, Schwikowski B, Ideker T. Cytoscape: a software environment for integrated models of biomolecular interaction networks. *Genome Res*. 2003; 13:2498–504.  
<https://doi.org/10.1101/gr.1239303> PMID:[14597658](https://pubmed.ncbi.nlm.nih.gov/14597658/)
  20. Cao Y, Sun Z, Liao L, Meng Y, Han Q, Zhao RC. Human adipose tissue-derived stem cells differentiate into endothelial cells in vitro and improve postnatal neovascularization in vivo. *Biochem Biophys Res Commun*. 2005; 332:370–79.  
<https://doi.org/10.1016/j.bbrc.2005.04.135>  
 PMID:[15896706](https://pubmed.ncbi.nlm.nih.gov/15896706/)
  21. Razavi S, Zarkesh-Esfahani H, Morshed M, Vaezifar S, Karbasi S, Golozar MA. Nanobiocomposite of poly(lactide-co-glycolide)/chitosan electrospun scaffold can promote proliferation and transdifferentiation of Schwann-like cells from human adipose-derived stem cells. *J Biomed Mater Res A*. 2015; 103:2628–34.  
<https://doi.org/10.1002/jbm.a.35398> PMID:[25614290](https://pubmed.ncbi.nlm.nih.gov/25614290/)
  22. Li H, Han Z, Liu D, Zhao P, Liang S, Xu K. Autologous platelet-rich plasma promotes neurogenic differentiation of human adipose-derived stem cells in vitro. *Int J Neurosci*. 2013; 123:184–90.  
<https://doi.org/10.3109/00207454.2012.742077>  
 PMID:[23126279](https://pubmed.ncbi.nlm.nih.gov/23126279/)
  23. Kosaraju R, Rennert RC, Maan ZN, Duscher D, Barrera J, Whittam AJ, Januszyk M, Rajadas J, Rodrigues M, Gurtner GC. Adipose-derived stem cell-seeded hydrogels increase endogenous progenitor cell recruitment and neovascularization in wounds. *Tissue Eng Part A*. 2016; 22:295–305.  
<https://doi.org/10.1089/ten.tea.2015.0277>  
 PMID:[26871860](https://pubmed.ncbi.nlm.nih.gov/26871860/)
  24. Konno M, Hamabe A, Hasegawa S, Ogawa H, Fukusumi T, Nishikawa S, Ohta K, Kano Y, Ozaki M, Noguchi Y, Sakai D, Kudoh T, Kawamoto K, et al. Adipose-derived mesenchymal stem cells and regenerative medicine. *Dev Growth Differ*. 2013; 55:309–18.  
<https://doi.org/10.1111/dgd.12049>  
 PMID:[23452121](https://pubmed.ncbi.nlm.nih.gov/23452121/)
  25. Panés J, García-Olmo D, Van Assche G, Colombel JF, Reinisch W, Baumgart DC, Dignass A, Nachury M, Ferrante M, Kazemi-Shirazi L, Grimaud JC, de la Portilla F, Goldin E, et al, and ADMIRE CD Study Group Collaborators. Expanded allogeneic adipose-derived mesenchymal stem cells (Cx601) for complex perianal fistulas in Crohn’s disease: a phase 3 randomised, double-blind controlled trial. *Lancet*. 2016; 388:1281–90.  
[https://doi.org/10.1016/S0140-6736\(16\)31203-X](https://doi.org/10.1016/S0140-6736(16)31203-X)  
 PMID:[27477896](https://pubmed.ncbi.nlm.nih.gov/27477896/)
  26. de la Portilla F, Alba F, García-Olmo D, Herrerías JM, González FX, Galindo A. Expanded allogeneic adipose-derived stem cells (eASCs) for the treatment of complex perianal fistula in Crohn’s disease: results from a multicenter phase I/IIa clinical trial. *Int J Colorectal Dis*. 2013; 28:313–23.  
<https://doi.org/10.1007/s00384-012-1581-9>  
 PMID:[23053677](https://pubmed.ncbi.nlm.nih.gov/23053677/)
  27. Hang K, Ye C, Xu J, Chen E, Wang C, Zhang W, Ni L, Kuang Z, Ying L, Xue D, Pan Z. Apelin enhances the osteogenic differentiation of human bone marrow mesenchymal stem cells partly through Wnt/ $\beta$ -catenin signaling pathway. *Stem Cell Res Ther*. 2019; 10:189.  
<https://doi.org/10.1186/s13287-019-1286-x>  
 PMID:[31238979](https://pubmed.ncbi.nlm.nih.gov/31238979/)
  28. Taracha A, Kotarba G, Wilanowski T. Neglected functions of TFCEP2/TFCEP2L1/UBP1 transcription factors may offer valuable insights into their mechanisms of action. *Int J Mol Sci*. 2018; 19:2852.  
<https://doi.org/10.3390/ijms19102852>  
 PMID:[30241344](https://pubmed.ncbi.nlm.nih.gov/30241344/)
  29. Parrales A, Ranjan A, Iyer SV, Padhye S, Weir SJ, Roy A, Iwakuma T. DNAJA1 controls the fate of misfolded

- mutant p53 through the mevalonate pathway. *Nat Cell Biol.* 2016; 18:1233–43.  
<https://doi.org/10.1038/ncb3427>  
PMID:27775703
30. Stark JL, Mehla K, Chaika N, Acton TB, Xiao R, Singh PK, Montelione GT, Powers R. Structure and function of human DnaJ homologue subfamily a member 1 (DNAJA1) and its relationship to pancreatic cancer. *Biochemistry.* 2014; 53:1360–72.  
<https://doi.org/10.1021/bi401329a>  
PMID:24512202
31. Ribeiro A, Laranjeira P, Mendes S, Velada I, Leite C, Andrade P, Santos F, Henriques A, Grãos M, Cardoso CM, Martinho A, Pais M, da Silva CL, et al. Mesenchymal stem cells from umbilical cord matrix, adipose tissue and bone marrow exhibit different capability to suppress peripheral blood B, natural killer and T cells. *Stem Cell Res Ther.* 2013; 4:125.  
<https://doi.org/10.1186/scrt336>  
PMID:24406104
32. Ceccarelli S, Pontecorvi P, Anastasiadou E, Napoli C, Marchese C. Immunomodulatory effect of adipose-derived stem cells: the cutting edge of clinical application. *Front Cell Dev Biol.* 2020; 8:236.  
<https://doi.org/10.3389/fcell.2020.00236>  
PMID:32363193
33. Waldner M, Zhang W, James IB, Allbright K, Havis E, Bliley JM, Almadori A, Schweizer R, Plock JA, Washington KM, Gorantla VS, Solari MG, Marra KG, Rubin JP. Characteristics and immunomodulating functions of adipose-derived and bone marrow-derived mesenchymal stem cells across defined human leukocyte antigen barriers. *Front Immunol.* 2018; 9:1642.  
<https://doi.org/10.3389/fimmu.2018.01642>  
PMID:30087676
34. Sun SC. The non-canonical NF- $\kappa$ B pathway in immunity and inflammation. *Nat Rev Immunol.* 2017; 17:545–58.  
<https://doi.org/10.1038/nri.2017.52>  
PMID:28580957
35. Wiese S, Reidegeld KA, Meyer HE, Warscheid B. Protein labeling by iTRAQ: a new tool for quantitative mass spectrometry in proteome research. *Proteomics.* 2007; 7:340–50.  
<https://doi.org/10.1002/pmic.200600422>  
PMID:17177251
36. Ritchie ME, Phipson B, Wu D, Hu Y, Law CW, Shi W, Smyth GK. Limma powers differential expression analyses for RNA-sequencing and microarray studies. *Nucleic Acids Res.* 2015; 43:e47.  
<https://doi.org/10.1093/nar/gkv007> PMID:25605792
37. Colaprico A, Silva TC, Olsen C, Garofano L, Cava C, Carolini D, Sabedot TS, Malta TM, Pagnotta SM, Castiglioni I, Ceccarelli M, Bontempi G, Noushmehr H. TCGAbiolinks: an R/bioconductor package for integrative analysis of TCGA data. *Nucleic Acids Res.* 2016; 44:e71.  
<https://doi.org/10.1093/nar/gkv1507> PMID:26704973
38. Langfelder P, Horvath S. WGCNA: an R package for weighted correlation network analysis. *BMC Bioinformatics.* 2008; 9:559.  
<https://doi.org/10.1186/1471-2105-9-559>  
PMID:19114008
39. Kasprowska-Liśkiewicz D. The cell on the edge of life and death: crosstalk between autophagy and apoptosis. *Postepy Hig Med Dosw.* 2017; 71:825–41.  
<https://doi.org/10.5604/01.3001.0010.4672>  
PMID:28931747
40. Qi H. Immunology: nervous crosstalk to make antibodies. *Nature.* 2017; 547:288–90.  
<https://doi.org/10.1038/nature23097>  
PMID:28700583
41. Szklarczyk D, Morris JH, Cook H, Kuhn M, Wyder S, Simonovic M, Santos A, Doncheva NT, Roth A, Bork P, Jensen LJ, von Mering C. The STRING database in 2017: quality-controlled protein-protein association networks, made broadly accessible. *Nucleic Acids Res.* 2017; 45:D362–68.  
<https://doi.org/10.1093/nar/gkw937>  
PMID:27924014
42. Gu Z, Gu L, Eils R, Schlesner M, Brors B. Circlize implements and enhances circular visualization in R. *Bioinformatics.* 2014; 30:2811–12.  
<https://doi.org/10.1093/bioinformatics/btu393>  
PMID:24930139
43. Yu G, Wang LG, Han Y, He QY. clusterProfiler: an R package for comparing biological themes among gene clusters. *OMICS.* 2012; 16:284–87.  
<https://doi.org/10.1089/omi.2011.0118>  
PMID:22455463
44. Doncheva NT, Morris JH, Gorodkin J, Jensen LJ. Cytoscape StringApp: network analysis and visualization of proteomics data. *J Proteome Res.* 2019; 18:623–32.  
<https://doi.org/10.1021/acs.jproteome.8b00702>  
PMID:30450911
45. Hänzelmann S, Castelo R, Guinney J. GSEA: gene set variation analysis for microarray and RNA-seq data. *BMC Bioinformatics.* 2013; 14:7.  
<https://doi.org/10.1186/1471-2105-14-7>  
PMID:23323831
